# Supplementary material for: Identification of perturbed signaling pathways from gene expression data using information divergence
Source: Royal Society of Chemistry journal article supplement (doi:10.1039/c7mb00285h), 2017-06-27
Supplement: c7mb00285h1.xlsx [file c7mb00285h1.xlsx]

## Sheet: Table list
List of Supplementary Tables
S1	166 non-metabolic KEGG pathways
S2	Perturbed pathways detected by Reg_KLD on four colorectal cancer datasets
S3	Perturbed pathways detected by Reg_JSD on four colorectal cancer datasets
S4	Perturbed pathways detected by GSCA on four colorectal cancer datasets
S5	Perturbed pathways detected by DRAGEN on four colorectal cancer datasets
S6	Perturbed pathways detected by GSEA on four colorectal cancer datasets
S7	Perturbed pathways detected by Reg_KLD on four lung cancer datasets
S8	Perturbed pathways detected by Reg_JSD on four lung cancer datasets
S9	Perturbed pathways detected by GSCA on four lung cancer datasets
S10	Perturbed pathways detected by GSEA on four lung cancer datasets

## Sheet: Table S1
Table S1. 166 non-metabolic KEGG pathways
	Sequence Number	Pathway Name	Pathway ID
	1	RNA transport	hsa03013
	2	mRNA surveillance pathway	hsa03015
	3	RNA degradation	hsa03018
	4	PPAR signaling pathway	hsa03320
	5	Fanconi anemia pathway	hsa03460
	6	MAPK signaling pathway	hsa04010
	7	ErbB signaling pathway	hsa04012
	8	Ras signaling pathway	hsa04014
	9	Rap1 signaling pathway	hsa04015
	10	Calcium signaling pathway	hsa04020
	11	cGMP-PKG signaling pathway	hsa04022
	12	cAMP signaling pathway	hsa04024
	13	Cytokine-cytokine receptor interaction	hsa04060
	14	Chemokine signaling pathway	hsa04062
	15	NF-kappa B signaling pathway	hsa04064
	16	HIF-1 signaling pathway	hsa04066
	17	FoxO signaling pathway	hsa04068
	18	Phosphatidylinositol signaling system	hsa04070
	19	Neuroactive ligand-receptor interaction	hsa04080
	20	Cell cycle	hsa04110
	21	Oocyte meiosis	hsa04114
	22	p53 signaling pathway	hsa04115
	23	Sulfur relay system	hsa04122
	24	SNARE interactions in vesicular transport	hsa04130
	25	Regulation of autophagy	hsa04140
	26	Protein processing in endoplasmic reticulum	hsa04141
	27	mTOR signaling pathway	hsa04150
	28	PI3K-Akt signaling pathway	hsa04151
	29	AMPK signaling pathway	hsa04152
	30	Apoptosis	hsa04210
	31	Adrenergic signaling in cardiomyocytes	hsa04261
	32	Vascular smooth muscle contraction	hsa04270
	33	Wnt signaling pathway	hsa04310
	34	Dorso-ventral axis formation	hsa04320
	35	Notch signaling pathway	hsa04330
	36	Hedgehog signaling pathway	hsa04340
	37	TGF-beta signaling pathway	hsa04350
	38	Axon guidance	hsa04360
	39	VEGF signaling pathway	hsa04370
	40	Osteoclast differentiation	hsa04380
	41	Hippo signaling pathway	hsa04390
	42	Focal adhesion	hsa04510
	43	ECM-receptor interaction	hsa04512
	44	Cell adhesion molecules (CAMs)	hsa04514
	45	Adherens junction	hsa04520
	46	Tight junction	hsa04530
	47	Gap junction	hsa04540
	48	Signaling pathways regulating pluripotency of stem cells	hsa04550
	49	Complement and coagulation cascades	hsa04610
	50	Platelet activation	hsa04611
	51	Antigen processing and presentation	hsa04612
	52	Toll-like receptor signaling pathway	hsa04620
	53	NOD-like receptor signaling pathway	hsa04621
	54	RIG-I-like receptor signaling pathway	hsa04622
	55	Cytosolic DNA-sensing pathway	hsa04623
	56	Jak-STAT signaling pathway	hsa04630
	57	Natural killer cell mediated cytotoxicity	hsa04650
	58	T cell receptor signaling pathway	hsa04660
	59	B cell receptor signaling pathway	hsa04662
	60	Fc epsilon RI signaling pathway	hsa04664
	61	Fc gamma R-mediated phagocytosis	hsa04666
	62	TNF signaling pathway	hsa04668
	63	Leukocyte transendothelial migration	hsa04670
	64	Intestinal immune network for IgA production	hsa04672
	65	Circadian rhythm	hsa04710
	66	Circadian entrainment	hsa04713
	67	Long-term potentiation	hsa04720
	68	Neurotrophin signaling pathway	hsa04722
	69	Retrograde endocannabinoid signaling	hsa04723
	70	Glutamatergic synapse	hsa04724
	71	Cholinergic synapse	hsa04725
	72	Serotonergic synapse	hsa04726
	73	GABAergic synapse	hsa04727
	74	Dopaminergic synapse	hsa04728
	75	Long-term depression	hsa04730
	76	Olfactory transduction	hsa04740
	77	Taste transduction	hsa04742
	78	Phototransduction	hsa04744
	79	Inflammatory mediator regulation of TRP channels	hsa04750
	80	Regulation of actin cytoskeleton	hsa04810
	81	Insulin signaling pathway	hsa04910
	82	Insulin secretion	hsa04911
	83	GnRH signaling pathway	hsa04912
	84	Ovarian steroidogenesis	hsa04913
	85	Progesterone-mediated oocyte maturation	hsa04914
	86	Estrogen signaling pathway	hsa04915
	87	Melanogenesis	hsa04916
	88	Prolactin signaling pathway	hsa04917
	89	Thyroid hormone synthesis	hsa04918
	90	Thyroid hormone signaling pathway	hsa04919
	91	Adipocytokine signaling pathway	hsa04920
	92	Oxytocin signaling pathway	hsa04921
	93	Type II diabetes mellitus	hsa04930
	94	Non-alcoholic fatty liver disease (NAFLD)	hsa04932
	95	Type I diabetes mellitus	hsa04940
	96	Maturity onset diabetes of the young	hsa04950
	97	Aldosterone-regulated sodium reabsorption	hsa04960
	98	Endocrine and other factor-regulated calcium reabsorption	hsa04961
	99	Vasopressin-regulated water reabsorption	hsa04962
	100	Salivary secretion	hsa04970
	101	Gastric acid secretion	hsa04971
	102	Pancreatic secretion	hsa04972
	103	Carbohydrate digestion and absorption	hsa04973
	104	Bile secretion	hsa04976
	105	Mineral absorption	hsa04978
	106	Alzheimer's disease	hsa05010
	107	Parkinson's disease	hsa05012
	108	Amyotrophic lateral sclerosis (ALS)	hsa05014
	109	Huntington's disease	hsa05016
	110	Prion diseases	hsa05020
	111	Cocaine addiction	hsa05030
	112	Amphetamine addiction	hsa05031
	113	Morphine addiction	hsa05032
	114	Alcoholism	hsa05034
	115	Bacterial invasion of epithelial cells	hsa05100
	116	Vibrio cholerae infection	hsa05110
	117	Epithelial cell signaling in Helicobacter pylori infection	hsa05120
	118	Pathogenic Escherichia coli infection	hsa05130
	119	Shigellosis	hsa05131
	120	Salmonella infection	hsa05132
	121	Pertussis	hsa05133
	122	Legionellosis	hsa05134
	123	Leishmaniasis	hsa05140
	124	Chagas disease (American trypanosomiasis)	hsa05142
	125	African trypanosomiasis	hsa05143
	126	Malaria	hsa05144
	127	Toxoplasmosis	hsa05145
	128	Amoebiasis	hsa05146
	129	Staphylococcus aureus infection	hsa05150
	130	Tuberculosis	hsa05152
	131	Hepatitis C	hsa05160
	132	Hepatitis B	hsa05161
	133	Measles	hsa05162
	134	Influenza A	hsa05164
	135	HTLV-I infection	hsa05166
	136	Herpes simplex infection	hsa05168
	137	Epstein-Barr virus infection	hsa05169
	138	Pathways in cancer	hsa05200
	139	Transcriptional misregulation in cancer	hsa05202
	140	Viral carcinogenesis	hsa05203
	141	Proteoglycans in cancer	hsa05205
	142	MicroRNAs in cancer	hsa05206
	143	Colorectal cancer	hsa05210
	144	Renal cell carcinoma	hsa05211
	145	Pancreatic cancer	hsa05212
	146	Endometrial cancer	hsa05213
	147	Glioma	hsa05214
	148	Prostate cancer	hsa05215
	149	Thyroid cancer	hsa05216
	150	Basal cell carcinoma	hsa05217
	151	Melanoma	hsa05218
	152	Bladder cancer	hsa05219
	153	Chronic myeloid leukemia	hsa05220
	154	Acute myeloid leukemia	hsa05221
	155	Small cell lung cancer	hsa05222
	156	Non-small cell lung cancer	hsa05223
	157	Asthma	hsa05310
	158	Autoimmune thyroid disease	hsa05320
	159	Inflammatory bowel disease (IBD)	hsa05321
	160	Systemic lupus erythematosus	hsa05322
	161	Rheumatoid arthritis	hsa05323
	162	Allograft rejection	hsa05330
	163	Graft-versus-host disease	hsa05332
	164	Arrhythmogenic right ventricular cardiomyopathy (ARVC)	hsa05412
	165	Dilated cardiomyopathy	hsa05414
	166	Viral myocarditis	hsa05416

## Sheet: Table S2-S6
	Table S2. Perturbed pathways detected by Reg_KLD on four colorectal cancer datasets
	[1]cAMP signaling pathway
	[2]Chemokine signaling pathway
	[3]Cholinergic synapse
	[4]Colorectal cancer
	[5]Glutamatergic synapse
	[6]Insulin signaling pathway
	[7]NF-kappa B signaling pathway
	[8]PI3K-Akt signaling pathway
	[9]Proteoglycans in cancer
	[10]Rap1 signaling pathway
	[11]Ras signaling pathway
	[12]Wnt signaling pathway
	Table S3. Perturbed pathways detected by Reg_JSD on four colorectal cancer datasets
	[1]Calcium signaling pathway
	[2]cAMP signaling pathway
	[3]Cell cycle
	[4]Chemokine signaling pathway
	[5]Cholinergic synapse
	[6]Colorectal cancer
	[7]Cytokine-cytokine receptor interaction
	[8]Focal adhesion
	[9]MAPK signaling pathway
	[10]NF-kappa B signaling pathway
	[11]PI3K-Akt signaling pathway
	[12]Rap1 signaling pathway
	[13]Ras signaling pathway
	[14]Wnt signaling pathway
	Table S4. Perturbed pathways detected by GSCA on four colorectal cancer datasets
	[1]Bile secretion
	[2]Calcium signaling pathway
	[3]Cell adhesion molecules (CAMs)
	[4]cGMP-PKG signaling pathway
	[5]Gap junction
	[6]Intestinal immune network for IgA production
	[7]MicroRNAs in cancer
	[8]PPAR signaling pathway
	[9]Vascular smooth muscle contraction
	Table S5. Perturbed pathways detected by DRAGEN on four colorectal cancer datasets
	[1]NF-kappa B signaling pathway
	Table S6. Perturbed pathways detected by GSEA on four colorectal cancer datasets
	[1]GnRH signaling pathway

## Sheet: Table S7-S10
	Table S7. Perturbed pathways detected by Reg_KLD on four lung cancer datasets
	[1]PPAR signaling pathway
	[2]MAPK signaling pathway
	[3]Ras signaling pathway
	[4]cAMP signaling pathway
	[5]Chemokine signaling pathway
	[6]FoxO signaling pathway
	[7]Cell cycle
	[8]PI3K-Akt signaling pathway
	[9]Vascular smooth muscle contraction
	[10]Hippo signaling pathway
	[11]Focal adhesion
	[12]ECM-receptor interaction
	[13]Jak-STAT signaling pathway
	[14]Leukocyte transendothelial migration
	[15]Pathways in cancer
	Table S8. Perturbed pathways detected by Reg_JSD on four lung cancer datasets
	[1]PPAR signaling pathway
	[2]MAPK signaling pathway
	[3]Ras signaling pathway
	[4]Calcium signaling pathway
	[5]Chemokine signaling pathway
	[6]FoxO signaling pathway
	[7]Cell cycle
	[8]Oocyte meiosis
	[9]p53 signaling pathway
	[10]PI3K-Akt signaling pathway
	[11]AMPK signaling pathway
	[12]Vascular smooth muscle contraction
	[13]Wnt signaling pathway
	[14]TGF-beta signaling pathway
	[15]Hippo signaling pathway
	[16]Focal adhesion
	[17]Jak-STAT signaling pathway
	[18]TNF signaling pathway
	[19]Leukocyte transendothelial migration
	[20]Long-term potentiation
	[21]Oxytocin signaling pathway
	[22]Pathways in cancer
	[23]Small cell lung cancer
	Table S9. Perturbed pathways detected by GSCA on four lung cancer datasets
	[1]RNA transport
	[2]mRNA surveillance pathway
	[3]PPAR signaling pathway
	[4]Phosphatidylinositol signaling system
	[5]Cell cycle
	[6]Regulation of autophagy
	[7]Vascular smooth muscle contraction
	[8]Focal adhesion
	[9]ECM-receptor interaction
	[10]Adherens junction
	[11]Platelet activation
	[12]Leukocyte transendothelial migration
	[13]Long-term potentiation
	[14]Small cell lung cancer
	[15]Non-small cell lung cancer
	Table S10. Perturbed pathways detected by GSEA on four lung cancer datasets
	[1]Vascular smooth muscle contraction
	[2]cAMP signaling pathway
	[3]cGMP-PKG signaling pathway
	[4]Neuroactive ligand-receptor interaction
	[5]Ras signaling pathway
	[6]Calcium signaling pathway
	[7]Oxytocin signaling pathway
	[8]Tight junction
